# Supplementary material for: A novel linkage-isomeric pair of dinuclear Pd(ii) complexes bearing a bis-bidentate tetraphos ligand
Source: Royal Society of Chemistry journal article supplement (doi:10.1039/b815392b), 2009-01-01

## Supplementary Information

### **A novel linkage-isomeric pair of dinuclear Pd(II) complexes, bearing a bis-bidentate tetrachos ligand; synthesis, characterization and application in the co- and terpolymerization of CO-ethene and propene**

**Markus Fessler,<sup>a</sup> Sylvia Eller,<sup>a</sup> Barbara Trettenbrein,<sup>a</sup> Georg Czermak,<sup>a</sup> Peter Brüggeller,<sup>a,\*</sup> Lorenzo Bettucci,<sup>b</sup> Claudio Bianchini,<sup>b</sup> Andrea Meli,<sup>b</sup> Andrea Ienco<sup>b</sup> and Werner Oberhauser<sup>b,\*</sup>**

<sup>a</sup> *Institut für Allgemeine, Anorganische und Theoretische Chemie der Universität Innsbruck, Innrain 52a, 6020 Innsbruck, Austria.*

*E-mail: [Peter.Brueggeller@uibk.ac.at](mailto:Peter.Brueggeller@uibk.ac.at); Fax: +43-512-5072934*

<sup>b</sup> *Istituto di Chimica dei Composti Organometallici (ICCOM-CNR), Area di Ricerca CNR di Firenze, via Madonna del Piano 10, 50019 Sesto Fiorentino, Italy.*

*E-mail: [werner.oberhauser@iccom.cnr.it](mailto:werner.oberhauser@iccom.cnr.it); Fax: +39-055-5225203*

**Energy and Enthalpy values as well as Cartesian atom coordinates for 1a<sub>5</sub>, 1a<sub>6</sub>, 1b', 1c', 2a<sub>5</sub>, 2a<sub>6</sub>, 2b', 2c', 3a<sub>5</sub>, 3a<sub>6</sub>, 3b' and 3c'.**

**1a<sub>5</sub>**

Energy = -3621.827158 Hartree  
Zero-point vibrational energy 407158.9 (Joules/Mol)  
Zero-point correction = 0.155079 (Hartree/Particle)  
Thermal correction to Energy = 0.176205  
Thermal correction to Enthalpy = 0.177149  
Thermal correction to Gibbs Free Energy = 0.102881  
Sum of electronic and zero-point Energies = -3621.672079  
Sum of electronic and thermal Energies = -3621.650953  
Sum of electronic and thermal Enthalpies = -3621.650009  
Sum of electronic and thermal Free Energies = -3621.724277

|       |           |           |           |
|-------|-----------|-----------|-----------|
| 1 Pd  | 0.000000  | 0.000000  | -3.894473 |
| 2 Cl  | 0.574600  | -1.659419 | -5.450122 |
| 3 P   | 0.489695  | -1.567423 | -2.283347 |
| 4 C   | -0.188915 | -0.757979 | -0.756622 |
| 5 H   | -0.060584 | -2.860913 | -2.339611 |
| 6 H   | 1.838880  | -1.853547 | -1.987425 |
| 7 H   | -1.279908 | -0.846767 | -0.852658 |
| 8 Pd  | 0.000000  | 0.000000  | 3.894473  |
| 9 Cl  | 0.574600  | 1.659419  | 5.450122  |
| 10 P  | 0.489695  | 1.567423  | 2.283347  |
| 11 C  | -0.188915 | 0.757979  | 0.756622  |
| 12 H  | -0.060584 | 2.860913  | 2.339611  |
| 13 H  | 1.838880  | 1.853547  | 1.987425  |
| 14 H  | -1.279908 | 0.846767  | 0.852658  |
| 15 Cl | -0.574600 | 1.659419  | -5.450122 |
| 16 P  | -0.489695 | 1.567423  | -2.283347 |
| 17 C  | 0.188915  | 0.757979  | -0.756622 |
| 18 H  | 0.060584  | 2.860913  | -2.339611 |
| 19 H  | -1.838880 | 1.853547  | -1.987425 |
| 20 H  | 1.279908  | 0.846767  | -0.852658 |
| 21 Cl | -0.574600 | -1.659419 | 5.450122  |
| 22 P  | -0.489695 | -1.567423 | 2.283347  |
| 23 C  | 0.188915  | -0.757979 | 0.756622  |
| 24 H  | 0.060584  | -2.860913 | 2.339611  |
| 25 H  | -1.838880 | -1.853547 | 1.987425  |
| 26 H  | 1.279908  | -0.846767 | 0.852658  |

**1a<sub>6</sub>**

Energy: HF = -3621.8649438  
Zero-point vibrational energy 409932.4 (Joules/Mol)

Zero-point correction= 0.156135 (Hartree/Particle)  
Thermal correction to Energy= 0.176755  
Thermal correction to Enthalpy= 0.177699  
Thermal correction to Gibbs Free Energy= 0.103908  
Sum of electronic and zero-point Energies= -3621.708809  
Sum of electronic and thermal Energies= -3621.688189  
Sum of electronic and thermal Enthalpies= -3621.687245  
Sum of electronic and thermal Free Energies= -3621.761035

|      |           |           |           |
|------|-----------|-----------|-----------|
| 1 Pd | -0.041508 | 0.440181  | -2.694592 |
| 2 Pd | -0.127370 | 0.345389  | 4.123688  |
| 3 Cl | -1.805678 | 0.452151  | -4.256995 |
| 4 Cl | 1.762189  | 0.469930  | -4.210901 |
| 5 Cl | -0.136194 | -1.460043 | 5.638206  |
| 6 Cl | -0.154124 | 2.107761  | 5.687914  |
| 7 P  | -1.744748 | 0.411279  | -1.200892 |
| 8 P  | 1.622708  | 0.428242  | -1.157278 |
| 9 P  | -0.101529 | -1.317094 | 2.584675  |
| 10 P | -0.118361 | 2.050314  | 2.631653  |
| 11 C | -1.178269 | 0.389381  | 0.578392  |
| 12 H | -2.046434 | 0.375559  | 1.246981  |
| 13 C | 1.010654  | 0.400278  | 0.606749  |
| 14 H | 1.861320  | 0.394974  | 1.297572  |
| 15 C | -0.081297 | -0.703030 | 0.821237  |
| 16 H | -0.068055 | -1.552911 | 0.129554  |
| 17 C | -0.092600 | 1.485856  | 0.851784  |
| 18 H | -0.088254 | 2.354777  | 0.184053  |
| 19 H | -2.630931 | -0.681312 | -1.258035 |
| 20 H | -2.641542 | 1.496359  | -1.227844 |
| 21 H | 2.521486  | -0.654979 | -1.191454 |
| 22 H | 2.508461  | 1.522680  | -1.161069 |
| 23 H | 0.990053  | -2.205761 | 2.616821  |
| 24 H | -1.187656 | -2.213034 | 2.588685  |
| 25 H | -1.212976 | 2.935383  | 2.660773  |
| 26 H | 0.964718  | 2.948115  | 2.688407  |

### 1b'

Energy = -1812.1559805  
Zero-point vibrational energy 258847.1 (Joules/Mol)  
Zero-point correction= 0.098590 (Hartree/Particle)  
Thermal correction to Energy= 0.109462  
Thermal correction to Enthalpy= 0.110406  
Thermal correction to Gibbs Free Energy= 0.060868  
Sum of electronic and zero-point Energies= -1812.057391  
Sum of electronic and thermal Energies= -1812.046519  
Sum of electronic and thermal Enthalpies= -1812.045575  
Sum of electronic and thermal Free Energies= -1812.095113

|      |          |          |           |
|------|----------|----------|-----------|
| 1 Pd | 0.000000 | 0.000000 | -3.974346 |
|------|----------|----------|-----------|

|      |           |           |           |
|------|-----------|-----------|-----------|
| 2 Cl | 0.498714  | -1.701903 | -5.524683 |
| 3 P  | 0.429413  | -1.505568 | -2.336529 |
| 4 C  | -0.116038 | -0.761520 | -0.704852 |
| 5 H  | -0.173825 | -2.776531 | -2.358316 |
| 6 H  | 1.777795  | -1.863943 | -2.130056 |
| 7 H  | -1.185217 | -0.982891 | -0.613437 |
| 8 Cl | -0.498714 | 1.701903  | -5.524683 |
| 9 P  | -0.429413 | 1.505568  | -2.336529 |
| 10 C | 0.116038  | 0.761520  | -0.704852 |
| 11 H | 0.173825  | 2.776531  | -2.358316 |
| 12 H | -1.777795 | 1.863943  | -2.130056 |
| 13 H | 1.185217  | 0.982891  | -0.613437 |
| 14 H | 0.390480  | -1.238410 | 0.139268  |
| 15 H | -0.390480 | 1.238410  | 0.139268  |

### 1c'

Energy = -1851.4787957

Zero-point vibrational energy 335566.7 (Joules/Mol)

Zero-point correction = 0.127811 (Hartree/Particle)

Thermal correction to Energy = 0.139818

Thermal correction to Enthalpy = 0.140762

Thermal correction to Gibbs Free Energy = 0.088099

Sum of electronic and zero-point Energies = -1851.350985

Sum of electronic and thermal Energies = -1851.338978

Sum of electronic and thermal Enthalpies = -1851.338034

Sum of electronic and thermal Free Energies = -1851.390697

|      |           |           |           |
|------|-----------|-----------|-----------|
| 1 Pd | -0.003596 | 0.547670  | -2.717853 |
| 2 Cl | -1.775376 | 0.718945  | -4.272330 |
| 3 Cl | 1.763868  | 0.652478  | -4.282993 |
| 4 P  | -1.702819 | 0.380351  | -1.224111 |
| 5 P  | 1.696957  | 0.316386  | -1.234267 |
| 6 H  | -0.009875 | -0.534473 | 2.051908  |
| 7 C  | -1.297006 | 0.369972  | 0.592262  |
| 8 H  | -2.152213 | -0.054380 | 1.127879  |
| 9 C  | 1.301952  | 0.320574  | 0.584544  |
| 10 H | 2.143596  | -0.136321 | 1.114841  |
| 11 C | -0.010509 | -0.396405 | 0.964881  |
| 12 H | -0.030990 | -1.407290 | 0.536489  |
| 13 H | -1.210272 | 1.415938  | 0.909101  |
| 14 H | -2.468396 | -0.791105 | -1.384468 |
| 15 H | -2.704576 | 1.362963  | -1.315041 |
| 16 H | 2.417315  | -0.882765 | -1.399353 |
| 17 H | 2.734210  | 1.260892  | -1.330990 |
| 18 H | 1.257035  | 1.368922  | 0.902162  |

### 2a5'

Energy = -3604.786358 Hartree  
Zero-point vibrational energy 410247.3 (Joules/Mol)  
Zero-point correction = 0.156255 (Hartree/Particle)  
Thermal correction to Energy = 0.176976  
Thermal correction to Enthalpy = 0.177920  
Thermal correction to Gibbs Free Energy = 0.103912  
Sum of electronic and zero-point Energies = -3604.630103  
Sum of electronic and thermal Energies = -3604.609382  
Sum of electronic and thermal Enthalpies = -3604.608438  
Sum of electronic and thermal Free Energies = -3604.682446

|       |           |           |           |
|-------|-----------|-----------|-----------|
| 1 Pt  | 0.000000  | 0.000000  | -3.883324 |
| 2 Cl  | 0.548358  | -1.649198 | -5.493766 |
| 3 P   | 0.476229  | -1.556778 | -2.288486 |
| 4 C   | -0.192497 | -0.757775 | -0.754915 |
| 5 H   | -0.089089 | -2.843076 | -2.367786 |
| 6 H   | 1.823754  | -1.862409 | -2.002002 |
| 7 H   | -1.283837 | -0.841532 | -0.847346 |
| 8 Pt  | 0.000000  | 0.000000  | 3.883324  |
| 9 Cl  | 0.548358  | 1.649198  | 5.493766  |
| 10 P  | 0.476229  | 1.556778  | 2.288486  |
| 11 C  | -0.192497 | 0.757775  | 0.754915  |
| 12 H  | -0.089089 | 2.843076  | 2.367786  |
| 13 H  | 1.823754  | 1.862409  | 2.002002  |
| 14 H  | -1.283837 | 0.841532  | 0.847346  |
| 15 Cl | -0.548358 | 1.649198  | -5.493766 |
| 16 P  | -0.476229 | 1.556778  | -2.288486 |
| 17 C  | 0.192497  | 0.757775  | -0.754915 |
| 18 H  | 0.089089  | 2.843076  | -2.367786 |
| 19 H  | -1.823754 | 1.862409  | -2.002002 |
| 20 H  | 1.283837  | 0.841532  | -0.847346 |
| 21 Cl | -0.548358 | -1.649198 | 5.493766  |
| 22 P  | -0.476229 | -1.556778 | 2.288486  |
| 23 C  | 0.192497  | -0.757775 | 0.754915  |
| 24 H  | 0.089089  | -2.843076 | 2.367786  |
| 25 H  | -1.823754 | -1.862409 | 2.002002  |
| 26 H  | 1.283837  | -0.841532 | 0.847346  |

## 2a<sub>g</sub>

Energy = -3604.8250731 Hartree  
Zero-point vibrational energy 412444.2 (Joules/Mol)  
Zero-point correction = 0.157092 (Hartree/Particle)  
Thermal correction to Energy = 0.177422  
Thermal correction to Enthalpy = 0.178366  
Thermal correction to Gibbs Free Energy = 0.104328  
Sum of electronic and zero-point Energies = -3604.667981  
Sum of electronic and thermal Energies = -3604.647651  
Sum of electronic and thermal Enthalpies = -3604.646707  
Sum of electronic and thermal Free Energies = -3604.720745

|      |           |           |           |
|------|-----------|-----------|-----------|
| 1 Pt | -0.042310 | 0.444287  | -2.684240 |
| 2 Pt | -0.126940 | 0.347685  | 4.113473  |
| 3 Cl | -1.774725 | 0.471562  | -4.314451 |
| 4 Cl | 1.729236  | 0.483096  | -4.271185 |
| 5 Cl | -0.137900 | -1.424564 | 5.700189  |
| 6 Cl | -0.157346 | 2.079667  | 5.744181  |
| 7 P  | -1.738325 | 0.407616  | -1.200420 |
| 8 P  | 1.615730  | 0.423999  | -1.158037 |
| 9 P  | -0.099528 | -1.309739 | 2.586737  |
| 10 P | -0.118350 | 2.044271  | 2.629797  |
| 11 C | -1.177506 | 0.387407  | 0.576604  |
| 12 H | -2.048658 | 0.374035  | 1.240835  |
| 13 C | 1.010244  | 0.399460  | 0.604228  |
| 14 H | 1.864365  | 0.395899  | 1.290379  |
| 15 C | -0.080654 | -0.703640 | 0.824633  |
| 16 H | -0.067127 | -1.557635 | 0.138395  |
| 17 C | -0.092901 | 1.484144  | 0.852592  |
| 18 H | -0.089503 | 2.355487  | 0.188491  |
| 19 H | -2.622134 | -0.687913 | -1.261216 |
| 20 H | -2.640548 | 1.489216  | -1.230622 |
| 21 H | 2.510156  | -0.664071 | -1.194281 |
| 22 H | 2.509369  | 1.513053  | -1.167321 |
| 23 H | 0.991990  | -2.199813 | 2.622731  |
| 24 H | -1.185162 | -2.207670 | 2.595742  |
| 25 H | -1.212315 | 2.931400  | 2.662140  |
| 26 H | 0.964905  | 2.943204  | 2.688707  |

## 2b'

Energy = -1803.6366758

Zero-point vibrational energy 260423.9 (Joules/Mol)

Zero-point correction = 0.099190 (Hartree/Particle)

Thermal correction to Energy = 0.109839

Thermal correction to Enthalpy = 0.110783

Thermal correction to Gibbs Free Energy = 0.061375

Sum of electronic and zero-point Energies = -1803.537486

Sum of electronic and thermal Energies = -1803.526837

Sum of electronic and thermal Enthalpies = -1803.525893

Sum of electronic and thermal Free Energies = -1803.575301

|      |           |           |           |
|------|-----------|-----------|-----------|
| 1 Pt | 0.000000  | 0.000000  | -3.951539 |
| 2 Cl | 0.484978  | -1.675732 | -5.567390 |
| 3 P  | 0.431996  | -1.501328 | -2.328693 |
| 4 C  | -0.112666 | -0.762435 | -0.698589 |
| 5 H  | -0.180281 | -2.768485 | -2.361967 |
| 6 H  | 1.778256  | -1.870542 | -2.123099 |
| 7 H  | -1.180150 | -0.989109 | -0.602600 |
| 8 Cl | -0.484978 | 1.675732  | -5.567390 |
| 9 P  | -0.431996 | 1.501328  | -2.328693 |

|    |   |           |           |           |
|----|---|-----------|-----------|-----------|
| 10 | C | 0.112666  | 0.762435  | -0.698589 |
| 11 | H | 0.180281  | 2.768485  | -2.361967 |
| 12 | H | -1.778256 | 1.870542  | -2.123099 |
| 13 | H | 1.180150  | 0.989109  | -0.602600 |
| 14 | H | 0.400963  | -1.237295 | 0.142268  |
| 15 | H | -0.400963 | 1.237295  | 0.142268  |

### 2c'

Energy = -1842.9590317  
Zero-point vibrational energy 336768.2 (Joules/Mol)  
Zero-point correction= 0.128268 (Hartree/Particle)  
Thermal correction to Energy= 0.140134  
Thermal correction to Enthalpy= 0.141078  
Thermal correction to Gibbs Free Energy= 0.088134  
Sum of electronic and zero-point Energies= -1842.830763  
Sum of electronic and thermal Energies= -1842.818898  
Sum of electronic and thermal Enthalpies= -1842.817953  
Sum of electronic and thermal Free Energies= -1842.870897

|    |    |           |           |           |
|----|----|-----------|-----------|-----------|
| 1  | Pt | 0.498594  | 0.027768  | -0.072097 |
| 2  | Cl | 2.154727  | -1.687646 | -0.164312 |
| 3  | Cl | 2.099069  | 1.798151  | -0.062106 |
| 4  | P  | -0.960955 | -1.692170 | -0.037469 |
| 5  | P  | -1.014548 | 1.696185  | 0.062409  |
| 6  | H  | -4.347834 | -0.065796 | 0.500205  |
| 7  | C  | -2.768256 | -1.317148 | -0.237291 |
| 8  | H  | -3.331855 | -2.188710 | 0.111230  |
| 9  | C  | -2.809512 | 1.277030  | -0.159234 |
| 10 | H  | -3.399712 | 2.107689  | 0.241299  |
| 11 | C  | -3.252311 | -0.048290 | 0.494272  |
| 12 | H  | -2.947623 | -0.075167 | 1.548721  |
| 13 | H  | -2.960353 | -1.222290 | -1.312399 |
| 14 | H  | -0.923733 | -2.446850 | 1.152951  |
| 15 | H  | -0.741710 | -2.702352 | -0.991912 |
| 16 | H  | -0.998537 | 2.380912  | 1.294808  |
| 17 | H  | -0.828749 | 2.766536  | -0.831598 |
| 18 | H  | -3.000748 | 1.241194  | -1.238086 |

### 3a5'

Energy = -3707.8617355 Hartree  
Zero-point vibrational energy 408189.8 (Joules/Mol)  
Zero-point correction= 0.155471 (Hartree/Particle)  
Thermal correction to Energy= 0.176267  
Thermal correction to Enthalpy= 0.177211  
Thermal correction to Gibbs Free Energy= 0.104775  
Sum of electronic and zero-point Energies= -3707.706264  
Sum of electronic and thermal Energies= -3707.685469

Sum of electronic and thermal Enthalpies= -3707.684524  
Sum of electronic and thermal Free Energies= -3707.756961

|       |           |           |           |
|-------|-----------|-----------|-----------|
| 1 Ni  | 0.000000  | 0.000000  | -3.852409 |
| 2 Cl  | 0.610145  | -1.559864 | -5.277332 |
| 3 P   | 0.465811  | -1.520307 | -2.317421 |
| 4 C   | -0.190768 | -0.757714 | -0.756417 |
| 5 H   | -0.087795 | -2.809224 | -2.408634 |
| 6 H   | 1.819848  | -1.813702 | -2.054524 |
| 7 H   | -1.283613 | -0.840141 | -0.845269 |
| 8 Ni  | 0.000000  | 0.000000  | 3.852409  |
| 9 Cl  | 0.610145  | 1.559864  | 5.277332  |
| 10 P  | 0.465811  | 1.520307  | 2.317421  |
| 11 C  | -0.190768 | 0.757714  | 0.756417  |
| 12 H  | -0.087795 | 2.809224  | 2.408634  |
| 13 H  | 1.819848  | 1.813702  | 2.054524  |
| 14 H  | -1.283613 | 0.840141  | 0.845269  |
| 15 Cl | -0.610145 | 1.559864  | -5.277332 |
| 16 P  | -0.465811 | 1.520307  | -2.317421 |
| 17 C  | 0.190768  | 0.757714  | -0.756417 |
| 18 H  | 0.087795  | 2.809224  | -2.408634 |
| 19 H  | -1.819848 | 1.813702  | -2.054524 |
| 20 H  | 1.283613  | 0.840141  | -0.845269 |
| 21 Cl | -0.610145 | -1.559864 | 5.277332  |
| 22 P  | -0.465811 | -1.520307 | 2.317421  |
| 23 C  | 0.190768  | -0.757714 | 0.756417  |
| 24 H  | 0.087795  | -2.809224 | 2.408634  |
| 25 H  | -1.819848 | -1.813702 | 2.054524  |
| 26 H  | 1.283613  | -0.840141 | 0.845269  |

### 3a<sub>6</sub>

Energy: =-3707.9029534 Hartree

Zero-point vibrational energy 411469.5 (Joules/Mol)

Zero-point correction= 0.156720 (Hartree/Particle)

Thermal correction to Energy= 0.176859

Thermal correction to Enthalpy= 0.177803

Thermal correction to Gibbs Free Energy= 0.106496

Sum of electronic and zero-point Energies= -3707.746233

Sum of electronic and thermal Energies= -3707.726095

Sum of electronic and thermal Enthalpies= -3707.725150

Sum of electronic and thermal Free Energies= -3707.796457

|      |           |           |           |
|------|-----------|-----------|-----------|
| 1 Ni | -0.038636 | 0.443272  | -2.665400 |
| 2 Ni | -0.131963 | 0.343240  | 4.094487  |
| 3 Cl | -1.699266 | 0.456614  | -4.112559 |
| 4 Cl | 1.661096  | 0.472122  | -4.066063 |
| 5 Cl | -0.143577 | -1.357836 | 5.493758  |
| 6 Cl | -0.159417 | 2.002461  | 5.543038  |
| 7 P  | -1.676593 | 0.413163  | -1.234208 |



|    |   |           |           |           |
|----|---|-----------|-----------|-----------|
| 8  | P | 1.559185  | 0.429791  | -1.189340 |
| 9  | P | -0.103149 | -1.253156 | 2.617114  |
| 10 | P | -0.120417 | 1.982568  | 2.664590  |
| 11 | C | -1.174140 | 0.389244  | 0.566676  |
| 12 | H | -2.060840 | 0.374892  | 1.211196  |
| 13 | C | 1.007238  | 0.400888  | 0.596883  |
| 14 | H | 1.875819  | 0.395985  | 1.265760  |
| 15 | C | -0.081074 | -0.699532 | 0.831311  |
| 16 | H | -0.067201 | -1.567489 | 0.161758  |
| 17 | C | -0.093157 | 1.481819  | 0.863283  |
| 18 | H | -0.089066 | 2.369122  | 0.219444  |
| 19 | H | -2.559177 | -0.680393 | -1.315599 |
| 20 | H | -2.570488 | 1.499446  | -1.282761 |
| 21 | H | 2.453752  | -0.655589 | -1.245373 |
| 22 | H | 2.444097  | 1.524215  | -1.213988 |
| 23 | H | 0.990717  | -2.137395 | 2.672194  |
| 24 | H | -1.189056 | -2.148507 | 2.641257  |
| 25 | H | -1.215256 | 2.865836  | 2.715561  |
| 26 | H | 0.964630  | 2.875663  | 2.745065  |

### 3b'

Energy = -1855.1743233

Zero-point vibrational energy 259199.0 (Joules/Mol)

Zero-point correction = 0.098724 (Hartree/Particle)

Thermal correction to Energy = 0.109440

Thermal correction to Enthalpy = 0.110384

Thermal correction to Gibbs Free Energy = 0.061874

Sum of electronic and zero-point Energies = -1855.075600

Sum of electronic and thermal Energies = -1855.064883

Sum of electronic and thermal Enthalpies = -1855.063939

Sum of electronic and thermal Free Energies = -1855.112450

|    |    |           |           |           |
|----|----|-----------|-----------|-----------|
| 1  | Ni | 0.000000  | 0.000000  | -3.932968 |
| 2  | Cl | 0.521368  | -1.608985 | -5.346836 |
| 3  | P  | 0.399104  | -1.459405 | -2.375665 |
| 4  | C  | -0.114249 | -0.762283 | -0.711655 |
| 5  | H  | -0.215385 | -2.723112 | -2.428565 |
| 6  | H  | 1.747901  | -1.832289 | -2.200962 |
| 7  | H  | -1.181422 | -0.986348 | -0.602694 |
| 8  | Cl | -0.521368 | 1.608985  | -5.346836 |
| 9  | P  | -0.399104 | 1.459405  | -2.375665 |
| 10 | C  | 0.114249  | 0.762283  | -0.711655 |
| 11 | H  | 0.215385  | 2.723112  | -2.428565 |
| 12 | H  | -1.747901 | 1.832289  | -2.200962 |
| 13 | H  | 1.181422  | 0.986348  | -0.602694 |
| 14 | H  | 0.408678  | -1.248654 | 0.116989  |
| 15 | H  | -0.408678 | 1.248654  | 0.116989  |

### 3c'

Energy = -1894.4960286  
Zero-point vibrational energy 336272.3 (Joules/Mol)  
Zero-point correction = 0.128079 (Hartree/Particle)  
Thermal correction to Energy = 0.139863  
Thermal correction to Enthalpy = 0.140808  
Thermal correction to Gibbs Free Energy = 0.089411  
Sum of electronic and zero-point Energies = -1894.367949  
Sum of electronic and thermal Energies = -1894.356165  
Sum of electronic and thermal Enthalpies = -1894.355221  
Sum of electronic and thermal Free Energies = -1894.406618

|      |           |           |           |
|------|-----------|-----------|-----------|
| 1 Ni | -0.004194 | 0.554501  | -2.693855 |
| 2 Cl | -1.668949 | 0.678114  | -4.138595 |
| 3 Cl | 1.653955  | 0.610204  | -4.150377 |
| 4 P  | -1.636690 | 0.406892  | -1.249298 |
| 5 P  | 1.631226  | 0.341106  | -1.260863 |
| 6 H  | -0.009467 | -0.542517 | 2.053722  |
| 7 C  | -1.289644 | 0.365091  | 0.583431  |
| 8 H  | -2.158557 | -0.069387 | 1.088045  |
| 9 C  | 1.295724  | 0.313140  | 0.574279  |
| 10 H | 2.150039  | -0.155893 | 1.072845  |
| 11 C | -0.010533 | -0.404858 | 0.966496  |
| 12 H | -0.032376 | -1.415724 | 0.537187  |
| 13 H | -1.211043 | 1.404529  | 0.923859  |
| 14 H | -2.404358 | -0.758697 | -1.438269 |
| 15 H | -2.631636 | 1.395823  | -1.343591 |
| 16 H | 2.350233  | -0.854277 | -1.455008 |
| 17 H | 2.664269  | 1.289429  | -1.362380 |
| 18 H | 1.261308  | 1.354876  | 0.915034  |

Full reference of 20a

M. J. Frisch, G. W. Trucks, H. B. Schlegel, G. E. Scuseria, M. A. Robb, J. R. Cheeseman, J. A. Montgomery, Jr., T. Vreven, K. N. Kudin, J. C. Burant, J. M. Millam, S. S. Iyengar, J. Tomasi, V. Barone, B. Mennucci, M. Cossi, G. Scalmani, N. Rega, G. A. Petersson, H. Nakatsuji, M. Hada, M. Ehara, K. Toyota, R. Fukuda, J. Hasegawa, M. Ishida, T. Nakajima, Y. Honda, O. Kitao, H. Nakai, M. Klene, X. Li, J. E. Knox, H. P. Hratchian, J. B. Cross, C. Adamo, J. Jaramillo, R. Gomperts, R. E. Stratmann, O. Yazyev, A. J. Austin, R. Cammi, C. Pomelli, J. W. Ochterski, P. Y. Ayala, K. Morokuma, G. A. Voth, P. Salvador, J. J. Dannenberg, V. G. Zakrzewski, S. Dapprich, A. D. Daniels, M. C. Strain, O. Farkas, D. K. Malick, A. D. Rabuck, K. Raghavachari, J. B. Foresman, J.

V. Ortiz, Q. Cui, A. G. Baboul, S. Clifford, J. Cioslowski, B. B. Stefanov, G. Liu, A. Liashenko, P.

Piskorz, I. Komaromi, R. L. Martin, D. J. Fox, T. Keith, M. A. Al-Laham, C. Y. Peng, A.

Nanayakkara, M. Challacombe, P. M. W. Gill, B. Johnson, W. Chen, M. W. Wong, C. Gonzalez,

and J. A. Pople, *Gaussian 03*, Revision C.02, Gaussian, Inc., Wallingford CT, 2004.

XRPD pattern of **1a<sub>5</sub>** and **2a<sub>5</sub>**

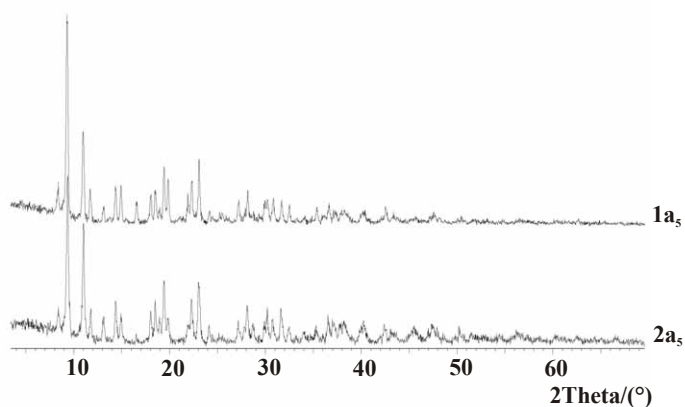

Supplement: b815392b.pdf [file b815392b.pdf]
